# Supplementary material for: Regulation of molecular clock oscillations and phagocytic activity via muscarinic Ca2+ signaling in human retinal pigment epithelial cells
Source: PubMed Central journal article supplement (PMC5343479; doi:10.1038/srep44175), 2017-03-09
Supplement: srep44175-s1.pdf [file srep44175-s1.pdf]

## Regulation of molecular clock oscillations and phagocytic activity via muscarinic Ca<sup>2+</sup> signaling in human retinal pigment epithelial cells

Rina Ikarashi\*<sup>1</sup>, Honami Akechi\*<sup>1</sup>, Yuzuki Kanda\*<sup>1</sup>, Alsawaf Ahmad<sup>2</sup>, Kouhei Takeuchi<sup>2</sup>, Eri Morioka<sup>1</sup>, Takashi Sugiyama<sup>3</sup>, Takashi Ebisawa<sup>4</sup>, Masaaki Ikeda<sup>5,6</sup> & Masayuki Ikeda<sup>1,2</sup>

<sup>1</sup>*Graduate School of Science and Engineering, University of Toyama, 3190 Gofuku, Toyama city, Toyama 930-8555, Japan*

<sup>2</sup>*Graduate School of Innovative Life Science, University of Toyama, 3190 Gofuku, Toyama city, Toyama 930-8555, Japan*

<sup>3</sup>*Advanced Core Technology Department, Research and Development Division, Olympus Co. Ltd., 2-3 Kuboyama, Hachioji, Tokyo 192-8512, Japan*

<sup>4</sup>*Department of Psychiatry, Tokyo Metropolitan Police Hospital, 4-22-1 Nakano, Nakano-ku, Tokyo 164-8541, Japan*

<sup>5</sup>*Department of Physiology, Saitama Medical University, 38 Morohongo, Moroyama, Iruma-gun, Saitama 350-0495, Japan*

<sup>6</sup>*Molecular Clock Project, Project Research Division, Research Center for Genomic Medicine, Saitama Medical University, 1397-1 Yamane, Hidaka city, Saitama, 350-1241, Japan*

SUPPLEMENTARY INFORMATION

## Supplementary methods

### The PCR primers

|                                               |                                 |
|-----------------------------------------------|---------------------------------|
| <i>human M1 receptor</i> forward              | 5'-AGACGCCAGGCAAAGGGGGTGG-3'    |
| <i>human M1 receptor</i> reverse              | 5'-CACGGGGCTTCTGGCCCTTGCC-3'    |
| <i>human M3 receptor</i> forward              | 5'-GACAGAAAACCTTTGTCCACCCAC-3'  |
| <i>human M3 receptor</i> reverse              | 5'-AGAAGTCTTAGCTGTGTCCACGGC-3'  |
| <i>human M5 receptor</i> forward              | 5'-CTCACCACCTGTAGCAGCTACCC-3'   |
| <i>human M5 receptor</i> reverse              | 5'-CTCTCTTTCGTTTGGTCATTGATG-3'  |
| <i>human Cry1</i> forward                     | 5'-CTCCATGGGCACTGGTCTCAGTG-3'   |
| <i>human Cry1</i> reverse                     | 5'-TCCCCACCAATTCAGCTGCAAC-3'    |
| <i>mouse Cry1</i> forward                     | 5'-CCCAGGCTTTTCAAGGAATGGAACA-3' |
| <i>mouse Cry1</i> reverse                     | 5'-TCTCATCATGGTCATCAGACAGAGG-3' |
| <i>human Cry2</i> forward                     | 5'-CCAAGAGGGAAGGGCAGGGTAGAG-3'  |
| <i>human Cry2</i> reverse                     | 5'-AGGATTTGAGGCACTGTTCCGAGG-3'  |
| <i>mouse Cry2</i> forward                     | 5'-GGGACTCTGTCTATTGGCATCTG-3'   |
| <i>mouse Cry2</i> reverse                     | 5'-GTCACTCTAGCCCGCTTGGT-3'      |
| <i>human Opn4</i> forward                     | 5'-GGACCGCTACCTGGTAATCA-3'      |
| <i>human Opn4</i> reverse                     | 5'-GGAGGAAGAACACGAAGCAG-3'      |
| <i>mouse Opn4</i> forward                     | 5'-CCAGCTTCACAACCAGTCCT-3'      |
| <i>mouse Opn4</i> reverse                     | 5'-CAGCCTGATGTGCAGATGTC-3'      |
| <i>human <math>\beta</math>-actin</i> forward | 5'-ATGGCCACGGCTGCTTCCAGC-3'     |
| <i>human <math>\beta</math>-actin</i> reverse | 5'-CATGGTGGTGCCGCCAGACAG-3'     |
| <i>mouse <math>\beta</math>-actin</i> forward | 5'-AGTGTGACGTTGACATCCGTA-3'     |
| <i>mouse <math>\beta</math>-actin</i> reverse | 5'-GCCAGAGCAGTAATCTCCTTCT-3'    |

### Supplementary figure 1. Effects of dominant-negative *Bmal1* (*DN-Bmal1*) transfections on *Bmal1* transcriptional rhythms

The *Bmal1* transcriptional rhythms were analyzed by *Bmal1-luciferase* activities using the Kronos-Dio luminometer system. Significant amplitude reductions were observed following *DN-Bmal1* transfections 1 day prior to the regular recording schedule.

### Supplementary movie 1. Time-lapse virtual color $\text{Ca}^{2+}$ imaging of hRPE-YC cells

This video demonstrates the entire process of 3-day changes in cytosolic  $\text{Ca}^{2+}$  concentrations shown in Fig. 3A. Warmer color corresponds to higher  $\text{Ca}^{2+}$  concentrations.

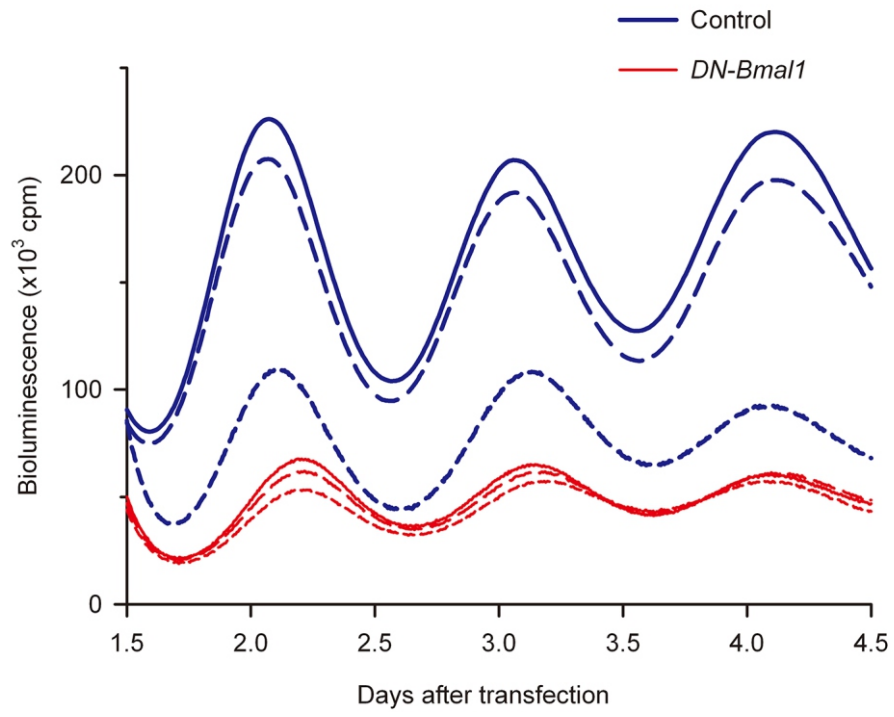

Supplementary Fig. 1
